# Supplementary material for: Can Public Spaces Effectively Be Used as Cleaner Indoor Air Shelters during Extreme Smoke Events?
Source: PubMed Central journal article supplement (PMC8070163; doi:10.3390/ijerph18084085), 2021-04-13
Supplement: ijerph-18-04085-s001.pdf [file ijerph-18-04085-s001.pdf]

Supplementary Materials: Checklist to assess the library as a cleaner indoor air shelter

**Table S1.** NCPHU Community Cleaner Air Shelter Practical Assessment Checklist.

Aim: to identify a building available during daytime hours for community members to freely utilize for cleaner air respite (no animals).

|                                         |  |
|-----------------------------------------|--|
| <b>Common Name of location</b>          |  |
| <b>Address</b>                          |  |
| <b>Building owner</b>                   |  |
| <b>Building occupier</b>                |  |
| <b>Facility Manager/HVAC contractor</b> |  |

| <b>Criteria</b>                                                                                                                                                                                                                                     | <b>Description</b> | <b>0 none<br/>1 ok<br/>2 good</b> |
|-----------------------------------------------------------------------------------------------------------------------------------------------------------------------------------------------------------------------------------------------------|--------------------|-----------------------------------|
| Opening hours (modification options?)                                                                                                                                                                                                               |                    |                                   |
| Parking                                                                                                                                                                                                                                             |                    |                                   |
| Bus                                                                                                                                                                                                                                                 |                    |                                   |
| Disabled access                                                                                                                                                                                                                                     |                    |                                   |
| HVAC Brand & model                                                                                                                                                                                                                                  |                    |                                   |
| Date of commissioning/installation                                                                                                                                                                                                                  |                    |                                   |
| Filter nature & type <ul style="list-style-type: none"> <li>○ Mechanical filter-based (flat/pleated HEPA: particle size?)</li> <li>○ Electrostatic precipitating</li> <li>○ Ion generators</li> <li>○ Carbon filters or ozone generators</li> </ul> |                    |                                   |
| Air exchange rate – variability                                                                                                                                                                                                                     |                    |                                   |
| Location of air ducts into room/s                                                                                                                                                                                                                   |                    |                                   |
| Ability to close inlets at night                                                                                                                                                                                                                    |                    |                                   |
| HVAC Manual/User guide                                                                                                                                                                                                                              |                    |                                   |
| R&M schedule available                                                                                                                                                                                                                              |                    |                                   |
| R&M records available                                                                                                                                                                                                                               |                    |                                   |
| Last service/filter change                                                                                                                                                                                                                          |                    |                                   |
| Plan of HVAC system                                                                                                                                                                                                                                 |                    |                                   |
| Odour indoors at time of assessment                                                                                                                                                                                                                 |                    |                                   |
| # Chairs / seats / couches for use                                                                                                                                                                                                                  |                    |                                   |
| # toilets male & female & disabled                                                                                                                                                                                                                  |                    |                                   |

|                                    |  |  |
|------------------------------------|--|--|
| Drinking water availability        |  |  |
| Food availability                  |  |  |
| Rubbish bins availability          |  |  |
| Telephone availability             |  |  |
| Max # persons rated                |  |  |
| Space for comm. engagement officer |  |  |
| Other comment                      |  |  |

EHO

Name \_\_\_\_\_ Date \_\_\_\_\_ Time\_

\_\_\_\_\_

Supplementary Material: Side by Side Comparison of Two Smog Units at Each of the Library Sites

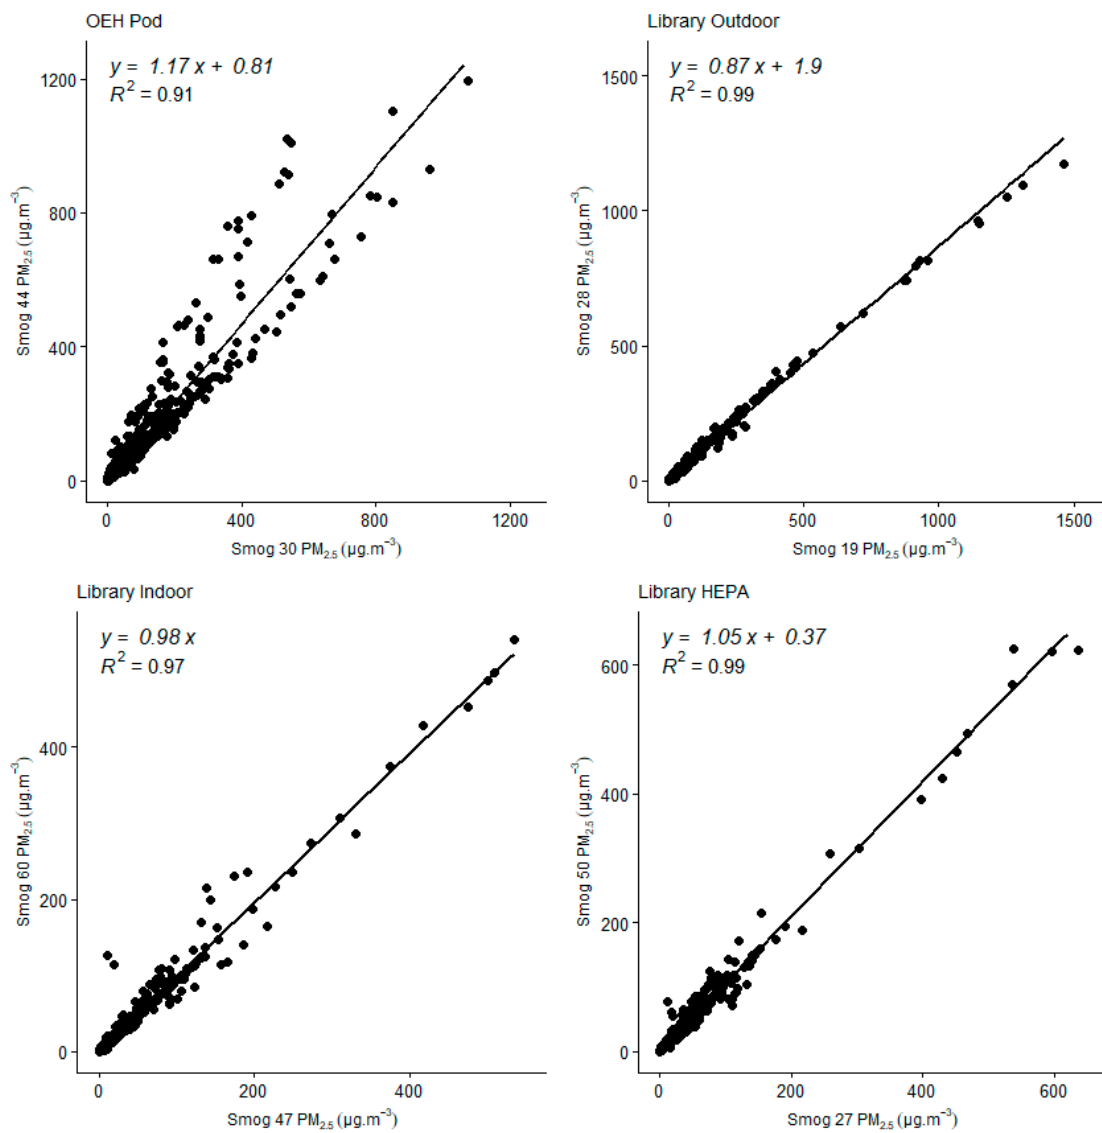

Figure S1. Port Macquarie study – SMOG unit pair correlations.
